# Supplementary material for: Photon-induced intramolecular charge transfer with the influence of D/A group and mode: optical physical properties and bio-imaging
Source: Royal Society of Chemistry journal article supplement (doi:10.1039/c3tc31506a), 2013-01-01
Supplement: c3tc31506a.pdf [file c3tc31506a.pdf]

**Supplementary material for manuscript:**

**Photon-induced intramolecular charge transfer with the influence of D/A group and mode: Optical physical properties and bio-imaging**

Zhipeng Yu <sup>a</sup>, Zheng Zheng <sup>a</sup>, Mingdi Yang <sup>a</sup>, Lianke Wang <sup>a</sup>, Yupeng Tian <sup>a</sup>, Jieying Wu <sup>a</sup>, Hongping Zhou <sup>a\*</sup>, Hongmei Xu <sup>b</sup> and Zongquan Wu <sup>c</sup>

\*Corresponding author. Fax: +86-551-5107342; Tel: +86-551-5108151

E-mail address: [zhpzhp@263.net](mailto:zhpzhp@263.net).

|                                                                                                                                                                                                                                                                                                                                                                                                                                                                                                               |    |
|---------------------------------------------------------------------------------------------------------------------------------------------------------------------------------------------------------------------------------------------------------------------------------------------------------------------------------------------------------------------------------------------------------------------------------------------------------------------------------------------------------------|----|
| <b>Synthesis and characterizations</b> .....                                                                                                                                                                                                                                                                                                                                                                                                                                                                  | 2  |
| <b>Figure S1.</b> Normalized one-photon emission spectra of <b>b1-b4</b> in DMF .....                                                                                                                                                                                                                                                                                                                                                                                                                         | 7  |
| <b>Figure S2.</b> the TPEF spectra of (a) <b>a1</b> (c) <b>a2</b> (e) <b>a3</b> (g) <b>a4</b> in DMF pumped by femtosecond laser pulses at 400 mw under different excitation wavelengths, respectively. Output fluorescence( $I_{out}$ ) vs. the square of input laser power ( $I_{in}$ ) for (b) <b>a1</b> in different powers under 680 nm (d) <b>a2</b> in different powers under 740 nm (f) <b>a3</b> in different powers under 710 nm (h) <b>a4</b> in different powers under 740 nm, respectively. .... | 7  |
| <b>Figure S3.</b> Two-photon absorption cross-sections of <b>a1-a5</b> in 680-820nm regions.....                                                                                                                                                                                                                                                                                                                                                                                                              | 8  |
| <b>Figure S4.</b> (A) One-photon fluorescence microscopy (OPFM) image of HepG2 cells with excitation at 350 nm (B) Bright-field image of HepG2 cells stained with <b>a1</b> . (C) Two-photon fluorescence microscopy (TPFM) image of HepG2 cells with excitation at 680 nm. (D) Merged image. ....                                                                                                                                                                                                            | 9  |
| <b>Table S1.</b> The $\lambda_{abs}$ , $\lambda_{em}$ and stock shifts with <b>a1-a5</b> in different solvents .....                                                                                                                                                                                                                                                                                                                                                                                          | 10 |

## Synthesis and characterizations

The target compounds, **a1-a5** and **b1-b4** have been prepared according to synthetic routes shown in **Scheme 1**. The experimental details are introduced as follows:

**Preparation of 4-Diphenylaminobenzaldehyde (M1):** 4-Diphenylaminobenzaldehyde (**M1**) was prepared referring the literature.<sup>[8]</sup>

**Preparation of 4, 4-diformyl triphenylamine (M2):** 4, 4-diformyl triphenylamine (**M2**) was prepared referring the literature.<sup>[7]</sup>

**Preparation of 4-[N, N'-bis(4-ethoxyphenyl)amino]benzaldehyde (M3):** 4-[N, N'-bis(4-ethoxyphenyl)amino] benzaldehyde (**M3**) was prepared referring the literature.<sup>[8]</sup>

**Preparation of 4-(1H-pyrazol-1-yl) benzaldehyde (M4):** 4-[N, N'-bis(4-ethoxyphenyl)amino] benzaldehyde (**M4**) was prepared referring the literature.<sup>[9]</sup>

**Preparation of 4-(1H-imidazole1-yl) benzaldehyde (M5):** 4-[N, N'-bis(4-ethoxyphenyl)amino] benzaldehyde (**M3**) was prepared referring the literature.<sup>[9]</sup>

**Preparation of a1: M1** (2.7 g, 10 mmol) was dissolved in 50 mL of ethanol. 1, 2-diaminobenzene (1.1 g, 10 mmol) was added. The stirred mixture was refluxed at 80 °C for 8h, and the resulting precipitation was filtered and recrystallization with ethanol to afford the product as pale-yellow solid. Yield: 2.2 g (67 %). <sup>1</sup>H-NMR (400 MHz, *d*<sub>6</sub>-DMSO): δ = 12.72 (1H, s), 8.04-8.06 (2H, d, *J* = 8.4 Hz), 7.60-7.62 (1H, d, *J* = 7.2 Hz) 7.47-7.49 (1H, d, *J* = 7.2 Hz), 7.35-7.39 (4H, d, *J* = 7.8 Hz), 7.11-7.12 (8H, m), 6.92-6.94 (2H, d, *J* = 8.4Hz). <sup>13</sup>C-NMR (100 MHz, *d*<sub>6</sub>-DMSO): 151.2, 148.7, 146.6, 129.7, 129.5, 127.6, 124.9, 123.9, 123.4, 121.6. IR (KBr, cm<sup>-1</sup>) 3446, 3056, 2919, 2853, 1592, 1493, 1478, 1436, 1402, 1331, 1275, 1193, 1118, 1076, 968, 841, 748, 695, 618, 509.

MALDI-TOF m/z:  $[M + H]^+$  Calcd for  $C_{25}H_{20}N_3$  362.166; Found 362.171

**Preparation of a2: M3** (3.6 g, 10 mmol) was dissolved in 50 mL of ethanol. 1, 2-diaminobenzene (1.1 g, 10 mmol) was added. The stirred mixture was refluxed at 80 °C for 8h, and the mixture was evaporated. The residue was purified by column chromatography on silica gel using petroleum ether/ ethyl acetate (5/1, v/v) as eluent to afford the product as pale-yellow solid. Yield: 2.0 g (43 %)  $^1H$ -NMR (400 MHz,  $d_6$ -DMSO):  $\delta$  = 12.69 (1H, s), 7.93-7.95 (2H, d,  $J$  = 8.4 Hz), 7.52 (2H, s), 7.10-7.12 (6H, m), 6.94-6.96 (4H, d,  $J$  = 8.4 Hz), 6.80-6.82 (2H, d,  $J$  = 8.4 Hz), 4.00-4.05 (4H, q,  $J$  = 6.9 Hz), 1.32-1.35 (6H, d,  $J$  = 7Hz).  $^{13}C$ -NMR (100 MHz,  $d_6$ -DMSO):  $\delta$  = 155.6, 151.6, 149.8, 139.1, 127.5, 127.4, 126.5, 121.5, 120.9, 117.6, 115.5, 63.2, 14.7. IR 3445, 3061, 2924, 2853, 1592, 1489, 1448, 1332, 1287, 1190, 838, 807, 754, 696, 510. IR (KBr,  $cm^{-1}$ ) 3445, 3042, 2975, 2925, 1604, 1506, 1472, 1440, 1396, 1319, 1274, 1238, 1192, 1165, 1113, 1046, 827, 746, 523. MALDI-TOF m/z:  $[M + H]^+$  Calcd for  $C_{29}H_{28}N_3O_2$  450.218; Found 450.218

**Preparation of a3: M1** (2.7 g, 10 mmol) was dissolved in 50 mL of nitrobenzene. 3, 3'-Diaminobenzidine (1.1 g, 5 mmol) was added. The stirred mixture was refluxed at 130 °C for 24h, and the resulting precipitation was filtered, washed with ethanol- $CH_2Cl_2$  (1/1,v/v) and dried to afford the product as yellow solid. Yield: 2.6 g (68 %).  $^1H$ -NMR (400 MHz,  $d_6$ -DMSO):  $\delta$  = 12.80 (2H, s), 8.07-8.10 (4H, d,  $J$  = 8.8 Hz), 7.80 (2H, s), 7.63 (2H, s), 7.51-7.53 (2H, d,  $J$  = 8.4 Hz), 7.36-7.40 (8H, t,  $J$  = 7.8 Hz), 7.12-7.16 (12H, t,  $J$  = 7.6 Hz), 7.06-7.08 (4H, d,  $J$  = 8.4 Hz).  $^{13}C$ -NMR (100 MHz,  $d_6$ -DMSO):  $\delta$  = 151.9, 148.8, 146.6, 129.8, 127.6, 124.9, 123.9, 123.2, 121.6. IR 3445, 3061, 2924, 2853, 1592, 1489, 1448, 1332, 1287, 1190, 838, 807, 754, 696, 510. MALDI-TOF m/z:  $[M + H]^+$  Calcd for  $C_{50}H_{37}N_6$  721.308; Found 721.307.

**Preparation of a4: M3** (3.6 g, 10 mmol) was dissolved in 50 mL of nitrobenzene. 3,

3'-Diaminobenzidine (1.1 g, 5 mmol) was added. The stirred mixture was refluxed at 130 °C for 24h, and the resulting precipitation was filtered, washed with ethanol and dried to afford the product as yellow solid. Yield: 2.78 g (59 %). <sup>1</sup>H-NMR (400 MHz, *d*<sub>6</sub>-DMSO): δ = 12.68 (2H, s), 7.97-7.99 (4H, d, *J* = 8.8 Hz), 7.84 (1H, s), 7.66 (2H, m), 7.46-7.54 (3H, m), 7.11-7.13 (8H, d, *J* = 8.8 Hz), 6.94-6.97 (8H, d, *J* = 8.4 Hz), 6.81-6.83 (4H, d, *J* = 8.8 Hz), 4.00-4.05 (8H, q, *J* = 6.9 Hz), 1.32-1.35 (12H, t, *J* = 6.8 Hz). <sup>13</sup>C-NMR (100 MHz, *d*<sub>6</sub>-DMSO): δ = 156.5, 152.5, 149.6, 137.7, 136.7, 129.1, 128.3, 115.9, 115.7, 63.3, 14.65. IR (KBr, cm<sup>-1</sup>) 3446, 2924, 2854, 1607, 1505, 1477, 1461, 1392, 1320, 1282, 1238, 1191, 1166, 1113, 1045, 826, 803, 697, 603, 577, 526. MALDI-TOF *m/z*: [M + H]<sup>+</sup> Calcd for C<sub>50</sub>H<sub>37</sub>N<sub>6</sub> 897.413; Found 897.071.

**Preparation of a5: M2** (3.0 g, 10 mmol) was dissolved in 50 mL of nitrobenzene. 1, 2-diaminobenzene (2.2 g, 20 mmol) was added. The stirred mixture was refluxed at 100 °C for 24h, and the resulting precipitation was filtered and washed with CH<sub>2</sub>Cl<sub>2</sub> to afford the product as yellow solid. Yield: 3.6 g (69 %). <sup>1</sup>H-NMR (400 MHz, *d*<sub>6</sub>-DMSO): δ = 12.83 (2H, s), 8.12-8.14 (4H, d, *J* = 8.8 Hz), 7.57 (4H, s), 7.41-7.45 (2H, t, *J* = 7.8 Hz), 7.17-7.21 (11H, m). <sup>13</sup>C-NMR (100 MHz, *d*<sub>6</sub>-DMSO): δ = 151.0, 148.1, 146.2, 130.0, 127.8, 125.6, 124.6, 124.4, 123.2, 121.9. IR (KBr, cm<sup>-1</sup>) 3446, 2958, 2920, 2853, 1603, 1494, 1477, 1438, 1429, 1399, 1318, 1276, 1180, 1120, 874, 840, 746, 698, 613, 551, 513. MALDI-TOF *m/z*: [M]<sup>+</sup> Calcd for C<sub>32</sub>H<sub>23</sub>N<sub>5</sub> 447.203; Found 447.129.

**Preparation of b1: M4** (1.7 g, 10 mmol) was dissolved in 50 mL of ethanol. 1, 2-diaminobenzene (1.1 g, 10 mmol) was added. The stirred mixture was refluxed at 80 °C for 8h, and the resulting precipitation was filtered and recrystallization with ethanol to afford the product as pale-yellow solid. Yield: 2.3 g (82 %). <sup>1</sup>H-NMR (DMSO-*d*<sub>6</sub>, 400 MHz, TMS): δ = 12.94 (s, 1H), 8.62-8.63 (d,

1H,  $J = 2.4$  Hz), 8.29-8.31 (d, 2H,  $J = 8.4$  Hz), 8.04-8.06 (d, 2H,  $J = 8.8$  Hz), 7.81-7.82 (d, 1H,  $J = 2.4$  Hz), 7.67-7.69 (d, 1H,  $J = 7.8$  Hz), 7.54-7.56 (d, 1H,  $J = 7.8$  Hz), 7.18-7.25 (m, 2H), 6.60-6.61 (t, 1H,  $J = 4.0$  Hz),  $^{13}\text{C}$ -NMR (DMSO- $d_6$ , 100 MHz, TMS):  $\delta = 150.6, 143.8, 141.4, 140.5, 135.0, 127.9, 127.8, 127.7, 122.5, 121.6, 118.8, 118.5, 111.3, 108.2$ . IR (KBr,  $\text{cm}^{-1}$ ) 3440.70, 3062.63, 2859.94, 2760.50, 2668.06, 1613.06, 1520.11, 1504.67, 1479.13, 1445.41, 1421.75, 1391.88, 1337.57, 1317.72, 1275.69, 1228.85, 1201.08, 1127.26, 1070.71, 1048.35, 1031.14, 1005.47, 968.65, 936.02, 915.09, 846.11, 750.39, 736.69, 609.91, 517.78. MALDI-TOF  $m/z$ :  $[\text{M} + \text{H}]^+$  Calcd for  $\text{C}_{16}\text{H}_{13}\text{N}_4$  260.106; Found 261.092.

**Preparation of b2: M5** (1.7 g, 10 mmol) was dissolved in 50 mL of ethanol. 1, 2-diaminobenzene (1.1 g, 10 mmol) was added. The stirred mixture was refluxed at  $80^\circ\text{C}$  for 8h, and the resulting precipitation was filtered and recrystallization with ethanol to afford the product as pale-yellow solid. Yield: 2.3 g (82 %).  $^1\text{H}$ -NMR (DMSO- $d_6$ , 400 MHz, TMS):  $\delta = 12.97$  (s, 1H), 8.40 (s, 1H), 8.29-8.31 (d, 2H,  $J = 8.8$  Hz), 7.89 (s, 1H), 7.87-7.88 (d, 2H,  $J = 1.2$  Hz), 7.67-7.69 (d, 1H,  $J = 7.6$  Hz), 7.54-7.56 (d, 1H,  $J = 7.8$  Hz), 7.20-7.24 (m, 2H), 7.16 (s, 1H),  $^{13}\text{C}$ -NMR (DMSO- $d_6$ , 100 MHz, TMS):  $\delta = 150.3, 143.8, 137.7, 135.5, 135.0, 130.1, 128.4, 127.8, 122.6, 121.8, 120.4, 118.9, 117.8, 111.3$ . IR (KBr,  $\text{cm}^{-1}$ ) 3447.82, 3108.73, 1608, 1550.02, 1507.54, 1438.64, 1311.13, 1276.89, 1248.26, 1119.47, 1060.30, 963.94, 841.19, 739.96, 654.49, 526.23. MALDI-TOF  $m/z$ :  $[\text{M}]^+$  Calcd for  $\text{C}_{32}\text{H}_{23}\text{N}_5$  260.106; Found 261.100.

**Preparation of b3: M4** (1.7 g, 10 mmol) was dissolved in 50 mL of nitrobenzene. 3, 3'-Diaminobenzidine (1.1 g, 5 mmol) was added. The stirred mixture was refluxed at  $130^\circ\text{C}$  for 24h, and the resulting precipitation was filtered and washed with  $\text{CH}_2\text{Cl}_2$  to afford the product as yellow solid. Yield: 2.3 g (82 %).  $^1\text{H}$ -NMR (DMSO- $d_6$ , 400 MHz, TMS):  $\delta = 13.05$  (s, 2H),

8.65-8.65 (d, 2H,  $J = 2.4$  Hz), 8.34-8.36 (d, 4H,  $J = 8.8$  Hz), 8.07-8.10 (d, 4H,  $J = 8.8$  Hz), 7.89 (s, 2H) 7.82-7.83 (d, 2H,  $J = 1.6$  Hz), 7.68-7.73 (d, 2H,  $J = 7.8$  Hz), 7.60-7.62 (d, 2H,  $J = 8.4$  Hz), 6.62-6.63 (t, 2H,  $J = 2.0$  Hz),  $^{13}\text{C}$ -NMR (DMSO- $d_6$ , 100 MHz, TMS):  $\delta = 151.2, 141.4, 140.5, 135.9, 135.2, 135.1, 129.7, 127.8, 127.7, 123.2, 122.1, 118.6, 108.2$ . IR (KBr,  $\text{cm}^{-1}$ ) 3364.93, 3099.98, 1613.13, 1551.57, 1519.90, 1497.98, 1469.39, 1448.56, 1469.39, 1448.56, 1420.42, 1395.67, 1338.42, 1294.80, 1201.98, 1125.88, 1051.03, 939.49, 844.90, 800.24, 751.20, 654.98, 612.96, 539.79. MALDI-TOF  $m/z$ :  $[\text{M}]^+$  Calcd for  $\text{C}_{32}\text{H}_{22}\text{N}_8$  519.197; Found 519.203.

**Preparation of b4:** **M5** (1.7 g, 10 mmol) was dissolved in 50 mL of nitrobenzene. 1, 2-diaminobenzene (1.1 g, 5 mmol) was added. The stirred mixture was refluxed at 130 °C for 24h, and the resulting precipitation was filtered and washed with  $\text{CH}_2\text{Cl}_2$  to afford the product as yellow solid. Yield: 2.3 g (82 %).  $^1\text{H}$ -NMR (DMSO- $d_6$ , 400 MHz, TMS):  $\delta = 13.06$  (s, 2H), 8.43 (s, 2H), 8.33-8.36 (d, 4H,  $J = 8.4$  Hz), 7.89-7.91 (d, 8H,  $J = 8.6$  Hz), 7.69-7.70 (m, 2H), 7.59-7.60 (d, 2H,  $J = 7.8$  Hz), 7.2 (s, 2H). The  $^{13}\text{C}$ -NMR of **b4** can hardly get due to its poor solubility. IR (KBr,  $\text{cm}^{-1}$ ) 3340.34, 3106.78, 1606.36, 1552.10, 1508.17, 1436.38, 1389.00, 1306.90, 1249.55, 1177.12, 1118.65, 1060.59, 962.35, 952.13, 914.77, 835.91, 800.62, 737.23, 691.41, 650.57, 617.83, 531.06. MALDI-TOF  $m/z$ :  $[\text{M}]^+$  Calcd for  $\text{C}_{32}\text{H}_{22}\text{N}_8$  519.197; Found 519.201.

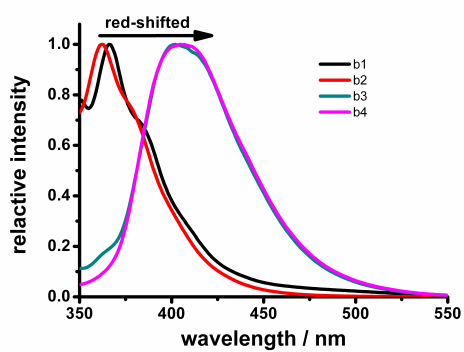

**Figure S1.** Normalized one-photon emission spectra of **b1-b4** in DMF

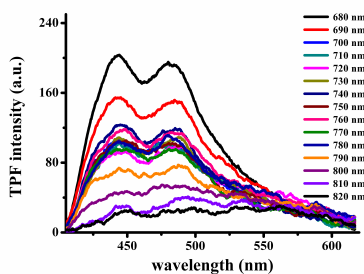

(a)

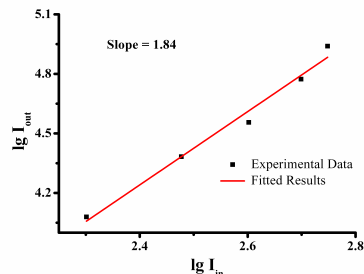

(b)

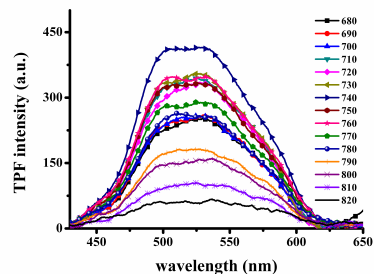

(c)

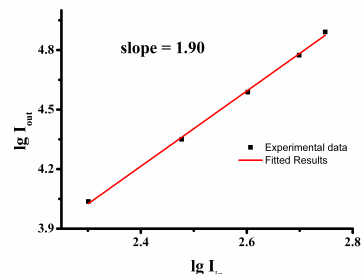

(d)

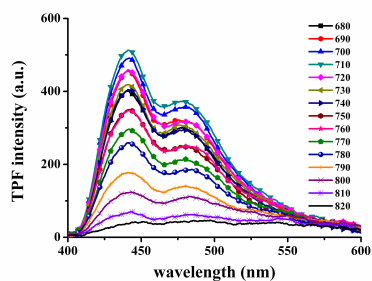

(e)

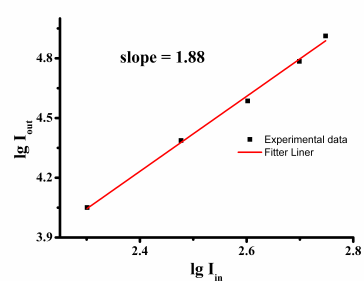

(f)

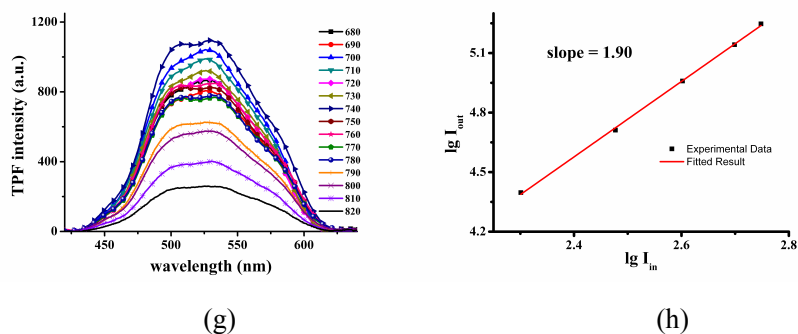

**Figure S2.** the TPEF spectra of (a) **a1** (c) **a2** (e) **a3** (g) **a4** in DMF pumped by femtosecond laser pulses at 400 mw under different excitation wavelengths, respectively. Output fluorescence( $I_{out}$ ) vs. the square of input laser power ( $I_{in}$ ) for (b) **a1** in different powers under 680 nm (d) **a2** in different powers under 740 nm (f) **a3** in different powers under 710 nm (h) **a4** in different powers under 740 nm, respectively.

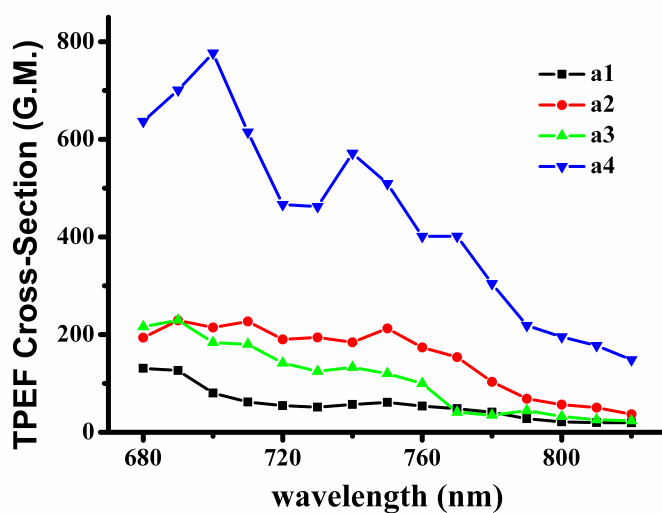

**Figure S3.** Two-photon absorption cross-sections of **a1-a5** in 680-820nm regions.



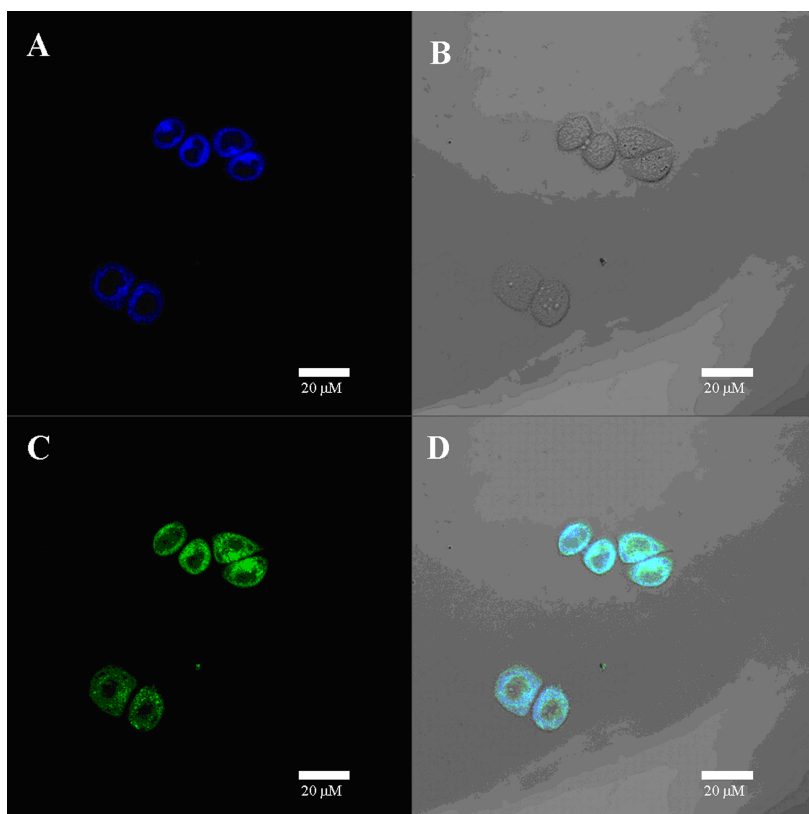

**Figure S4.** (A) One-photon fluorescence microscopy (OPFM) image of HepG2 cells with excitation at 350 nm (B) Bright-field image of HepG2 cells stained with **a1**. (C) Two-photon fluorescence microscopy (TPFM) image of HepG2 cells with excitation at 680 nm. (D) Merged image.

**Table S1.** The  $\lambda_{abs}$ ,  $\lambda_{em}$  and stock shifts with **a1-a5** in different solvents

|           | <i>solvents</i> | $\lambda_{abs}^a$ | $\lambda_{em}^c$ | stock shifts <sup>d</sup> |
|-----------|-----------------|-------------------|------------------|---------------------------|
| <b>a1</b> | benzene         | 353               | 401              | 3391                      |
|           | ethyl acetate   | 346               | 408              | 4309                      |
|           | DMF             | 351               | 424              | 4905                      |
|           | DMSO            | 354               | 432              | 5100                      |
| <b>a2</b> | benzene         | 354               | 448              | 5927                      |
|           | ethyl acetate   | 348               | 458              | 7020                      |
|           | DMF             | 350               | 477              | 7607                      |
|           | DMSO            | 354               | 488              | 7757                      |
| <b>a3</b> | benzene         | 374               | 409              | 2288                      |
|           | ethyl acetate   | 368               | 406              | 2543                      |
|           | DMF             | 374               | 416              | 2700                      |
|           | DMSO            | 376               | 421              | 2843                      |
| <b>a4</b> | benzene         | 379               | 444              | 3863                      |
|           | ethyl acetate   | 368               | 452              | 5050                      |
|           | DMF             | 374               | 478              | 5817                      |
|           | DMSO            | 378               | 489              | 6005                      |
| <b>a5</b> | benzene         | 373               | 408              | 2300                      |
|           | ethyl acetate   | 365               | 407              | 2827                      |
|           | DMF             | 372               | 419              | 3015                      |
|           | DMSO            | 373               | 426              | 3335                      |
| <b>b1</b> | benzene         | 320               | 367              | 4002                      |
|           | ethyl acetate   | 317.5             | 363              | 3948                      |
|           | DMF             | 319               | 366              | 4026                      |
|           | methanol        | 320               | 369              | 4150                      |
|           | DMSO            | 320               | 367              | 4002                      |
| <b>b2</b> | benzene         | 315               | 361              | 4045                      |
|           | ethyl acetate   | 311               | 358              | 4221                      |
|           | DMF             | 314               | 362              | 4223                      |
|           | DMSO            | 317               | 369              | 4445                      |
| <b>b3</b> | benzene         | 344.5             | 395              | 3711                      |
|           | ethyl acetate   | 342.5             | 394              | 3816                      |
|           | DMF             | 347               | 402              | 3943                      |
|           | DMSO            | 349               | 404              | 3901                      |
| <b>b4</b> | benzene         | 342.5             | 396              | 3945                      |
|           | ethyl acetate   | 377               | 395              | 1209                      |
|           | DMF             | 340.5             | 405              | 4677                      |
|           | DMSO            | 344               | 407              | 4500                      |

<sup>a</sup> Absorption peak position in nm (1  $\mu$ M). <sup>b</sup> Peak position of OPEF in nm (1  $\mu$ M), excited at the absorption maximum. <sup>c</sup> Stokes shift in  $\text{cm}^{-1}$ .
